# Supplementary material
Source: ML conference proceedings conference paper supplement (https://openaccess.thecvf.com/content/cvpr_2016/html/Tsai_Learning_Cross-Domain_Landmarks_2016_CVPR_paper.html)
Supplement: Supplementary file 1 [file Tsai_Learning_Cross-Domain_Landmarks_2016_CVPR_supplemental.pdf]

# Supplementary Material for Learning Cross-Domain Landmarks for Heterogeneous Domain Adaptation

Yao-Hung Hubert Tsai<sup>1</sup>, Yi-Ren Yeh<sup>2</sup>, Yu-Chiang Frank Wang<sup>1</sup>

<sup>1</sup>Research Center for IT Innovation, Academia Sinica, Taipei, Taiwan

<sup>2</sup>Department of Mathematics, National Kaohsiung Normal University, Kaohsiung, Taiwan

y.h.huberttsai@gmail.com, yryeh@nknku.edu.tw, ycwang@citi.sinica.edu.tw

We now provide technical details on the derivations of the supervised and full versions of our proposed *Cross-Domain Landmark Selection (CDLS)* algorithm. For the sake of conciseness, we do not repeat the definitions for each notation in the Supplementary.

## I. Optimization of CDLS<sub>-sup</sub>

Recall that in Section 3.2.1 of our manuscript, the objective function of CDLS for heterogeneous domain adaptation (HDA) (i.e., **CDLS<sub>-sup</sub>**) is:

$$\min_{\mathbf{A}} E_M(\mathbf{A}, \mathcal{D}_S, \mathcal{D}_L) + E_C(\mathbf{A}, \mathcal{D}_S, \mathcal{D}_L) + \lambda \|\mathbf{A}\|^2, \quad (\text{i})$$

where  $E_M(\mathbf{A}, \mathcal{D}_S, \mathcal{D}_L) =$

$$\left\| \frac{1}{n_S} \sum_{i=1}^{n_S} \mathbf{A} \mathbf{x}_s^i - \frac{1}{n_L} \sum_{i=1}^{n_L} \hat{\mathbf{x}}_l^i \right\|^2, \quad (\text{ii})$$

and  $E_C(\mathbf{A}, \mathcal{D}_S, \mathcal{D}_L) =$

$$\sum_{c=1}^C \frac{1}{n_S^c n_L^c} \sum_{i=1}^{n_S^c} \sum_{j=1}^{n_L^c} \left\| \mathbf{A} \mathbf{x}_s^{i,c} - \hat{\mathbf{x}}_l^{j,c} \right\|^2 + \left\| \frac{1}{n_S^c} \sum_{i=1}^{n_S^c} \mathbf{A} \mathbf{x}_s^{i,c} - \frac{1}{n_L^c} \sum_{i=1}^{n_L^c} \hat{\mathbf{x}}_l^{i,c} \right\|^2. \quad (\text{iii})$$

The minimization problems of (ii) and (iii) with respect to the transformation  $\mathbf{A}$  can be rewritten as follows:

$$\mathbf{A}^\top \mathbf{X}_S \mathbf{H}_{SM-sup} \mathbf{X}_S^\top \mathbf{A} - 2 \mathbf{A}^\top \mathbf{X}_S \mathbf{H}_{LM-sup} \hat{\mathbf{X}}_L^\top + \text{const}, \quad (\text{iv})$$

and

$$\mathbf{A}^\top \mathbf{X}_S \mathbf{H}_{SC-sup} \mathbf{X}_S^\top \mathbf{A} - 2 \mathbf{A}^\top \mathbf{X}_S \mathbf{H}_{LC-sup} \hat{\mathbf{X}}_L^\top + \text{const}, \quad (\text{v})$$

where

$$\mathbf{H}_{SM-sup}, \mathbf{H}_{SC-sup} \in \mathbb{R}^{n_S \times n_S},$$

$$\mathbf{H}_{LM-sup}, \mathbf{H}_{LC-sup} \in \mathbb{R}^{n_S \times n_L},$$

with entries

$$\begin{aligned} (\mathbf{H}_{SM-sup})_{ij} &= \frac{1}{n_S n_S}, & (\mathbf{H}_{LM-sup})_{ij} &= \frac{1}{n_S n_L} \\ (\mathbf{H}_{SC-sup})_{ij} &= \begin{cases} \frac{1+n_S^c}{n_S^c n_S^c} & \text{if } i, j \in \text{class } c \text{ and } i = j \\ \frac{1}{n_S^c n_S^c} & \text{if } i, j \in \text{class } c \text{ and } i \neq j \\ 0 & \text{otherwise} \end{cases} \\ (\mathbf{H}_{LC-sup})_{ij} &= \begin{cases} \frac{2}{n_S^c n_L^c} & \text{if } i, j \in \text{class } c \\ 0 & \text{otherwise} \end{cases}. \end{aligned}$$

By taking the derivatives of (iv) and (v) in (i) with respect to  $\mathbf{A}$  and setting it as 0, the closed-form of  $\mathbf{A}$  can be derived as:

$$\mathbf{A} = (\lambda \mathbf{I}_{d_S} + \mathbf{X}_S (\mathbf{H}_{SM-sup} + \mathbf{H}_{SC-sup}) \mathbf{X}_S^\top)^{-1} \cdot (\mathbf{X}_S (\mathbf{H}_{LM-sup} + \mathbf{H}_{LC-sup}) \hat{\mathbf{X}}_L^\top). \quad (\text{vi})$$

From the above derivations, the optimal solution  $\mathbf{A}$  for our **CDLS<sub>-sup</sub>** can be obtained.

## II. Optimization of CDLS

We now detail the optimization process for the full version of CDLS, which can be applied to solve semi-supervised HDA problems. For simplicity, we have  $\{\mathbf{X}_S, \mathbf{X}_T, \mathbf{X}_U\}$  denote source-domain data, labeled and unlabeled target-domain data, respectively.

### II.1. Derivation of Transformation $\mathbf{A}$

In our work, we apply the technique of alternative optimization for solving **CDLS**. As noted in our manuscript, with fixed landmark weights  $\alpha$  and  $\beta$ , the objective function for solving  $\mathbf{A}$  is:

$$\begin{aligned} \min_{\mathbf{A}} E_M(\mathbf{A}, \mathcal{D}_S, \mathcal{D}_L, \mathbf{X}_U, \boldsymbol{\alpha}, \boldsymbol{\beta}) + \\ E_C(\mathbf{A}, \mathcal{D}_S, \mathcal{D}_L, \mathbf{X}_U, \boldsymbol{\alpha}, \boldsymbol{\beta}) + \lambda \|\mathbf{A}\|^2, \end{aligned} \quad (\text{vii})$$

where  $E_M(\mathbf{A}, \mathcal{D}_S, \mathcal{D}_L, \mathbf{X}_U, \boldsymbol{\alpha}, \boldsymbol{\beta}) =$

$$\left\| \frac{1}{\delta n_S} \sum_{i=1}^{n_S} \alpha_i \mathbf{A} \mathbf{x}_s^i - \frac{1}{n_L + \delta n_U} \left( \sum_{i=1}^{n_L} \hat{\mathbf{x}}_l^i + \sum_{i=1}^{n_U} \beta_i \hat{\mathbf{x}}_u^i \right) \right\|^2, \quad (\text{viii})$$

and  $E_C(\mathbf{A}, \mathcal{D}_S, \mathcal{D}_L, \mathbf{X}_U, \boldsymbol{\alpha}, \boldsymbol{\beta}) =$

$$\sum_{c=1}^C E_{cond}^c + \frac{1}{e^c} E_{embed}^c. \quad (\text{ix})$$

Recall that, we have

$$\begin{aligned} E_{cond}^c &= \left\| \frac{1}{\delta n_S^c} \sum_{i=1}^{n_S^c} \alpha_i \mathbf{A} \mathbf{x}_s^{i,c} - \frac{1}{n_L^c + \delta n_U^c} \left( \sum_{i=1}^{n_L^c} \hat{\mathbf{x}}_l^{i,c} + \sum_{i=1}^{n_U^c} \beta_i \hat{\mathbf{x}}_u^{i,c} \right) \right\|^2, \\ E_{embed}^c &= \sum_{i=1}^{n_S^c} \sum_{j=1}^{n_L^c} \left\| \alpha_i \mathbf{A} \mathbf{x}_s^{i,c} - \hat{\mathbf{x}}_l^{j,c} \right\|^2 + \sum_{i=1}^{n_L^c} \sum_{j=1}^{n_U^c} \left\| \hat{\mathbf{x}}_l^{i,c} - \beta_j \hat{\mathbf{x}}_u^{j,c} \right\|^2 + \\ &\sum_{i=1}^{n_U^c} \sum_{j=1}^{n_S^c} \left\| \beta_j \hat{\mathbf{x}}_u^{i,c} - \alpha_j \mathbf{A} \mathbf{x}_s^{j,c} \right\|^2, \end{aligned}$$

and  $e^c = \delta n_S^c n_L^c + \delta n_L^c n_U^c + \delta^2 n_U^c n_S^c$ .

With the constraint of  $\frac{\boldsymbol{\alpha}^{c\top} \mathbf{1}}{n_S^c} = \frac{\boldsymbol{\beta}^{c\top} \mathbf{1}}{n_U^c} = \delta$ , we rewrite (viii) and (ix) into the following formulations:

$$\begin{aligned} \mathbf{A}^\top \mathbf{X}_S \mathbf{H}_{SM} \mathbf{X}_S^\top \mathbf{A} - 2 \mathbf{A}^\top \mathbf{X}_S \mathbf{H}_{LM} \hat{\mathbf{X}}_L^\top \\ - 2 \mathbf{A}^\top \mathbf{X}_S \mathbf{H}_{UM} \hat{\mathbf{X}}_U^\top + \text{const}, \end{aligned} \quad (\text{x})$$

and

$$\begin{aligned} \mathbf{A}^\top \mathbf{X}_S \mathbf{H}_{SC} \mathbf{X}_S^\top \mathbf{A} - 2 \mathbf{A}^\top \mathbf{X}_S \mathbf{H}_{LC} \hat{\mathbf{X}}_L^\top \\ - 2 \mathbf{A}^\top \mathbf{X}_S \mathbf{H}_{UC} \hat{\mathbf{X}}_U^\top + \text{const}, \end{aligned} \quad (\text{xi})$$

where

$$\begin{aligned} \mathbf{H}_{SM} &= \frac{1}{\delta^2 n_S n_S} \boldsymbol{\alpha} \cdot \boldsymbol{\alpha}^\top, \\ \mathbf{H}_{LM} &= \frac{1}{\delta n_S (n_L + \delta n_U)} \boldsymbol{\alpha} \cdot \mathbf{1}_{n_L}^\top, \\ \mathbf{H}_{UM} &= \frac{1}{\delta n_S (n_L + \delta n_U)} \boldsymbol{\alpha} \cdot \boldsymbol{\beta}^\top, \end{aligned}$$

$$\mathbf{H}_{SC} = \begin{bmatrix} \mathbf{H}_{SC}^1 & \mathbf{0} & \mathbf{0} & \mathbf{0} & \mathbf{0} \\ \mathbf{0} & \ddots & \mathbf{0} & \mathbf{0} & \mathbf{0} \\ \mathbf{0} & \mathbf{0} & \mathbf{H}_{SC}^c & \mathbf{0} & \mathbf{0} \\ \mathbf{0} & \mathbf{0} & \mathbf{0} & \ddots & \mathbf{0} \\ \mathbf{0} & \mathbf{0} & \mathbf{0} & \mathbf{0} & \mathbf{H}_{SC}^c \end{bmatrix} \quad \text{with}$$

$$\mathbf{H}_{SC}^c = \frac{1}{\delta^2 n_S^c n_S^c} \boldsymbol{\alpha}^c \cdot \boldsymbol{\alpha}^{c\top} + \frac{n_L^c + n_U^c}{e^c} \text{diag}(\boldsymbol{\alpha}^c \odot \boldsymbol{\alpha}^c),$$

$$\mathbf{H}_{LC} = \begin{bmatrix} \mathbf{H}_{LC}^1 & \mathbf{0} & \mathbf{0} & \mathbf{0} & \mathbf{0} \\ \mathbf{0} & \ddots & \mathbf{0} & \mathbf{0} & \mathbf{0} \\ \mathbf{0} & \mathbf{0} & \mathbf{H}_{LC}^c & \mathbf{0} & \mathbf{0} \\ \mathbf{0} & \mathbf{0} & \mathbf{0} & \ddots & \mathbf{0} \\ \mathbf{0} & \mathbf{0} & \mathbf{0} & \mathbf{0} & \mathbf{H}_{LC}^c \end{bmatrix} \quad \text{with}$$

$$\mathbf{H}_{LC}^c = \left( \frac{1}{\delta n_S^c (n_L^c + \delta n_U^c)} + \frac{1}{e^c} \right) \boldsymbol{\alpha}^c \cdot \mathbf{1}_{n_L^c}^\top,$$

$$\mathbf{H}_{UC} = \begin{bmatrix} \mathbf{H}_{UC}^1 & \mathbf{0} & \mathbf{0} & \mathbf{0} & \mathbf{0} \\ \mathbf{0} & \ddots & \mathbf{0} & \mathbf{0} & \mathbf{0} \\ \mathbf{0} & \mathbf{0} & \mathbf{H}_{UC}^c & \mathbf{0} & \mathbf{0} \\ \mathbf{0} & \mathbf{0} & \mathbf{0} & \ddots & \mathbf{0} \\ \mathbf{0} & \mathbf{0} & \mathbf{0} & \mathbf{0} & \mathbf{H}_{UC}^c \end{bmatrix} \quad \text{with}$$

$$\mathbf{H}_{UC}^c = \left( \frac{1}{\delta n_S^c (n_L^c + \delta n_U^c)} + \frac{1}{e^c} \right) \boldsymbol{\alpha}^c \cdot \boldsymbol{\beta}^{c\top},$$

and  $\odot$  denotes element-wise multiplication.

Similar to the optimization of **CDLS<sub>sup</sub>**, we take the derivatives of  $(\mathbf{x})$  and  $(\mathbf{xi})$  in (vii) with respect to  $\mathbf{A}$  and set it as 0. Then, we obtain the optimal solution  $\mathbf{A}$  as:

$$\mathbf{A} = \left( \lambda \mathbf{I}_{d_S} + \mathbf{X}_S \mathbf{H}_S \mathbf{X}_S^\top \right)^{-1} \left( \mathbf{X}_S \left( \mathbf{H}_L \hat{\mathbf{X}}_L^\top + \mathbf{H}_U \hat{\mathbf{X}}_U^\top \right) \right), \quad (\text{xii})$$

where

$$\begin{aligned} \mathbf{H}_S &= \mathbf{H}_{SM} + \mathbf{H}_{SC} \\ \mathbf{H}_L &= \mathbf{H}_{LM} + \mathbf{H}_{LC} \\ \mathbf{H}_U &= \mathbf{H}_{UM} + \mathbf{H}_{UC}. \end{aligned}$$

## II.2. Derivations of Landmark Weights

Now, we fix  $\mathbf{A}$  for optimizing landmark weights  $\boldsymbol{\alpha}$  and  $\boldsymbol{\beta}$ . The objective function can be formulated as:

$$\begin{aligned} \min_{\boldsymbol{\alpha}, \boldsymbol{\beta}} E_M(\mathbf{A}, \mathcal{D}_S, \mathcal{D}_L, \mathbf{X}_U, \boldsymbol{\alpha}, \boldsymbol{\beta}) + \\ E_C(\mathbf{A}, \mathcal{D}_S, \mathcal{D}_L, \mathbf{X}_U, \boldsymbol{\alpha}, \boldsymbol{\beta}) \end{aligned} \quad (\text{xiii})$$

$$\text{s.t. } \{\alpha_i^c, \beta_i^c\} \in [0, 1], \quad \frac{\boldsymbol{\alpha}^{c\top} \mathbf{1}}{n_S^c} = \frac{\boldsymbol{\beta}^{c\top} \mathbf{1}}{n_U^c} = \delta,$$

where  $E_M$  and  $E_C$  are defined in Section II.1.

To solve the above optimization problem, a Gram matrix  $\mathbf{G}$  for describing cross-domain data is introduced:

$$\begin{aligned} \mathbf{G} &\in \mathbb{R}^{(n_S + n_L + n_U) \times (n_S + n_L + n_U)} \\ &= [\mathbf{X}_S, \mathbf{X}_L, \mathbf{X}_U]^\top [\mathbf{X}_S, \mathbf{X}_L, \mathbf{X}_U]. \end{aligned}$$

For the ease of the derivations, we define four scaling matrices  $\Theta_{M,C1,C2,C3}$  as follows:

$$\Theta_M = \theta_M \theta_M^\top \quad \text{with } \theta_M = \left[ \frac{1}{\delta n_S} \mathbf{1}_{n_S}; \frac{1}{n_L + \delta n_U} \mathbf{1}_{n_L + n_U} \right],$$

$$\Theta_{C1} = \sum_{c=1}^C \theta_{C1}^c \theta_{C1}^{c\top} \text{ with}$$

$$\theta_{C1}^c = [\mathbf{0}; \dots; \mathbf{0}; \frac{1}{\delta n_S^c} \mathbf{1}_{n_S}^c; \mathbf{0}; \dots; \mathbf{0};$$

$$\mathbf{0}; \dots; \mathbf{0}; \frac{1}{n_L^c + \delta n_U^c} \mathbf{1}_{n_L}^c; \mathbf{0}; \dots; \mathbf{0};$$

$$\mathbf{0}; \dots; \mathbf{0}; \frac{1}{n_L^c + \delta n_U^c} \mathbf{1}_{n_U}^c; \mathbf{0}; \dots; \mathbf{0} ],$$

$$\Theta_{C2} = \sum_{c=1}^C \frac{1}{e^c} \theta_{C2}^c \theta_{C2}^{c\top} \text{ with}$$

$$\theta_{C2}^c = [\mathbf{0}; \dots; \mathbf{0}; \mathbf{1}_{n_S}^c; \mathbf{0}; \dots; \mathbf{0};$$

$$\mathbf{0}; \dots; \mathbf{0}; \mathbf{1}_{n_L}^c; \mathbf{0}; \dots; \mathbf{0};$$

$$\mathbf{0}; \dots; \mathbf{0}; \mathbf{1}_{n_U}^c; \mathbf{0}; \dots; \mathbf{0} ],$$

and

$$\Theta_{C3} = \sum_{c=1}^C \text{diag}(\theta_{C3}^c) \text{ with}$$

$$\theta_{C3}^c = [\mathbf{0}; \dots; \mathbf{0}; \frac{n_L^c + n_U^c}{e^c} \mathbf{1}_{n_S}^c; \mathbf{0}; \dots; \mathbf{0};$$

$$\mathbf{0}; \dots; \mathbf{0}; \frac{n_S^c + n_U^c}{e^c} \mathbf{1}_{n_L}^c; \mathbf{0}; \dots; \mathbf{0};$$

$$\mathbf{0}; \dots; \mathbf{0}; \frac{n_L^c + n_S^c}{e^c} \mathbf{1}_{n_U}^c; \mathbf{0}; \dots; \mathbf{0} ].$$

By integrating the scaling matrix with the Gram matrix  $\mathbf{G}$ , we have the following Gram matrices  $\mathbf{G}_{1\sim 3}$  calculated as:

$$\mathbf{G}_1 = \mathbf{G} \odot (\Theta_M + \Theta_{C1} + \Theta_{C3}),$$

$$\mathbf{G}_2 = \mathbf{G} \odot (\Theta_M + \Theta_{C1} + \Theta_{C2}), \quad (\text{xiv})$$

$$\mathbf{G}_3 = \mathbf{G} \odot (\Theta_M + \Theta_{C1} - \Theta_{C2}).$$

With (xiv), the original optimization problem of (xiii) becomes:

$$\min_{\alpha, \beta} \frac{1}{2} \alpha^\top \mathbf{K}_{S,S} \alpha + \frac{1}{2} \beta^\top \mathbf{K}_{U,U} \beta - \alpha^\top \mathbf{K}_{S,U} \beta$$

$$- \mathbf{k}_{S,L}^\top \alpha + \mathbf{k}_{U,L}^\top \beta + \text{const.} \quad (\text{xv})$$

$$\text{s.t. } \{\alpha_i^c, \beta_i^c\} \in [0, 1], \frac{\alpha^{c\top} \mathbf{1}}{n_S^c} = \frac{\beta^{c\top} \mathbf{1}}{n_U^c} = \delta,$$

where

$$\mathbf{K}_{S,S} = \mathbf{G}_1 (1 : n_S, 1 : n_S),$$

$$\mathbf{K}_{U,U} = \mathbf{G}_1 (n_S + n_L + 1 : \text{end}, n_S + n_L + 1 : \text{end}),$$

$$\mathbf{K}_{S,U} = \mathbf{G}_2 (1 : n_S, n_S + n_L + 1 : \text{end}),$$

$$\mathbf{k}_{S,L}(i) = \sum_{j=1}^{n_L} \mathbf{G}_2 (i, n_S + j),$$

$$\mathbf{k}_{U,L}(i) = \sum_{j=1}^{n_L} \mathbf{G}_3 (n_S + n_L + i, n_S + j).$$

To solve (xv), one can apply existing *Quadratic Programming* (QP) solvers and tackle the following problem instead:

$$\min_{z_i \in [0,1], \mathbf{Z}^\top \mathbf{v} = \mathbf{w}} \frac{1}{2} \mathbf{Z}^\top \mathbf{B} \mathbf{Z} + \mathbf{b}^\top \mathbf{Z}, \quad (\text{xvi})$$

where

$$\mathbf{Z} = \begin{pmatrix} \alpha \\ \beta \end{pmatrix}, \mathbf{B} = \begin{pmatrix} \mathbf{K}_{S,S} & -\mathbf{K}_{S,U} \\ -\mathbf{K}_{S,U}^\top & \mathbf{K}_{U,U} \end{pmatrix}, \mathbf{b} = \begin{pmatrix} -\mathbf{k}_{S,L} \\ \mathbf{k}_{U,L} \end{pmatrix},$$

$$\mathbf{V} = \begin{bmatrix} \mathbf{V}_S & \mathbf{0}_{n_S \times C} \\ \mathbf{0}_{n_U \times C} & \mathbf{V}_U \end{bmatrix} \in \mathbb{R}^{(n_S + n_U) \times 2C} \text{ with}$$

$$(\mathbf{V}_S)_{ij} = \begin{cases} 1 & \text{if } \mathbf{x}_s^i \in \text{class } j \\ 0 & \text{otherwise} \end{cases}$$

$$(\mathbf{V}_U)_{ij} = \begin{cases} 1 & \text{if } \mathbf{x}_u^i \text{ predicted as class } j \\ 0 & \text{otherwise} \end{cases},$$

$$\mathbf{W} \in \mathbb{R}^{1 \times 2C} \text{ with } (\mathbf{W})_c = \begin{cases} \delta n_S^c & \text{if } c \leq C \\ \delta n_U^{c-C} & \text{if } c > C \end{cases}.$$
